# Supplementary material
Source: PubMed Central journal article supplement (PMC5800490)

Figure 4a

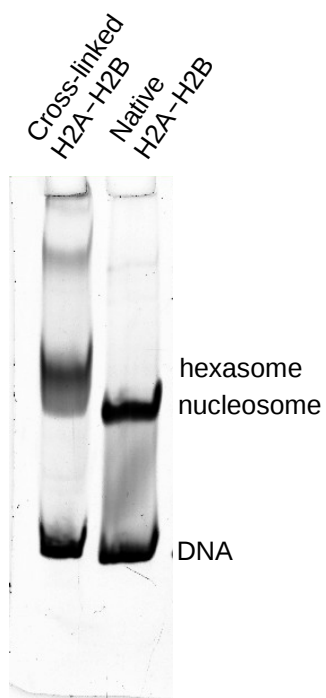

Figure 4b

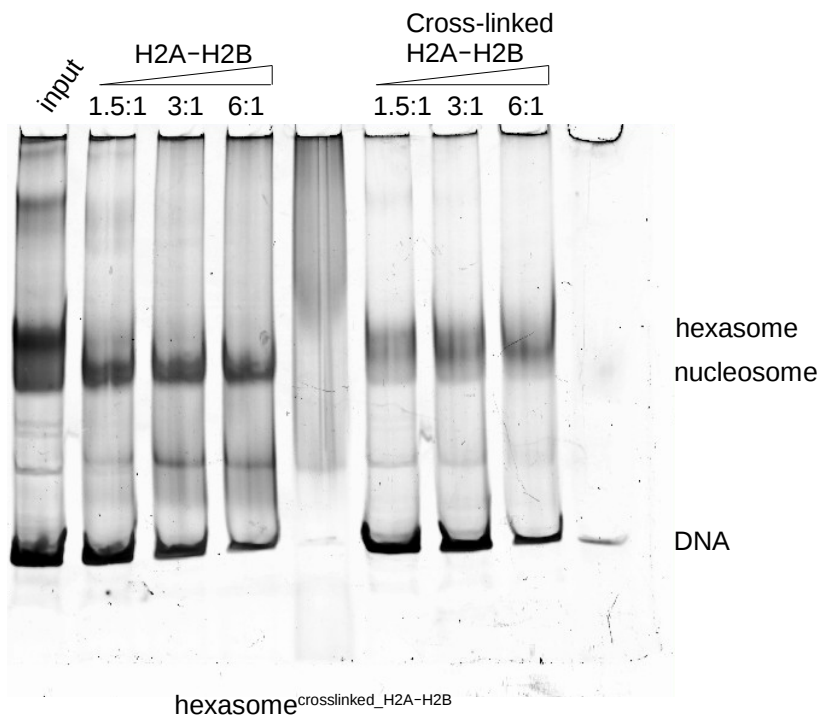

Figure 4c

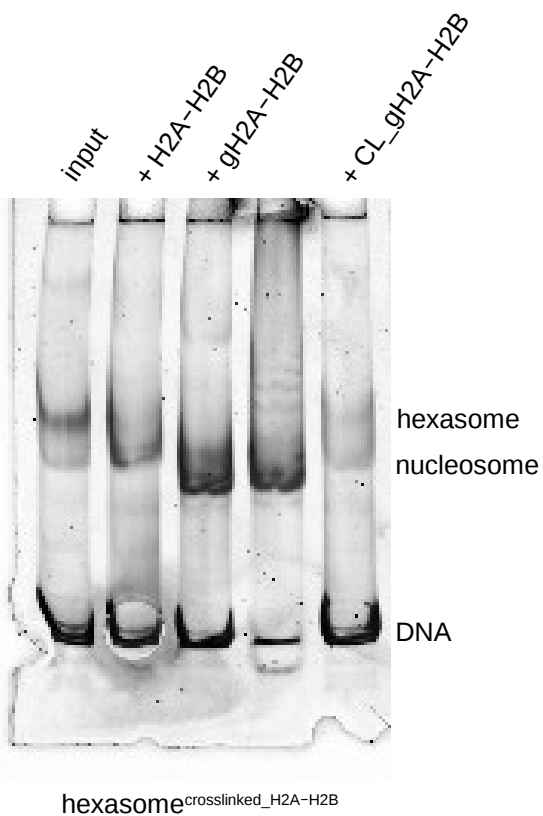

Figure 4d

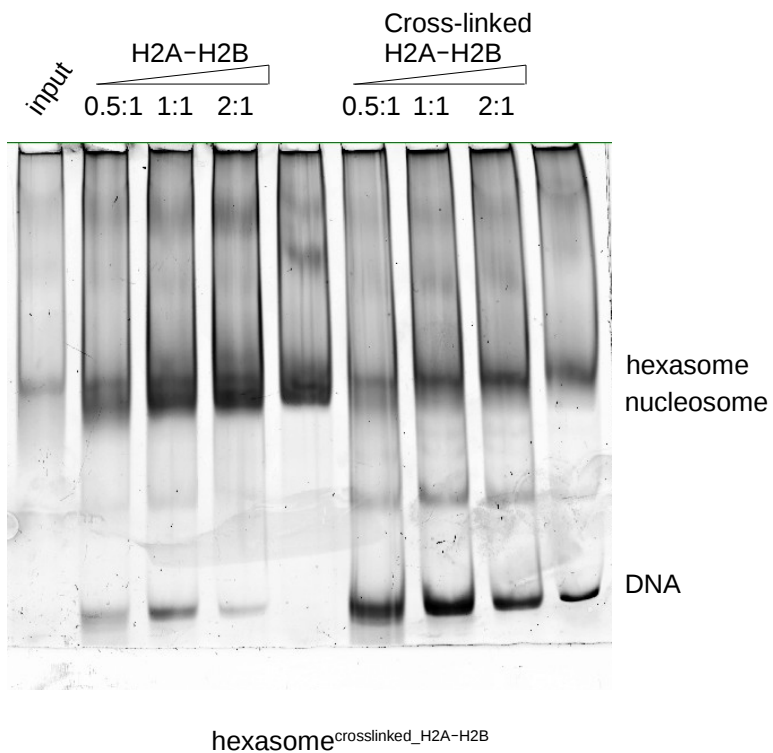

Figure 4e

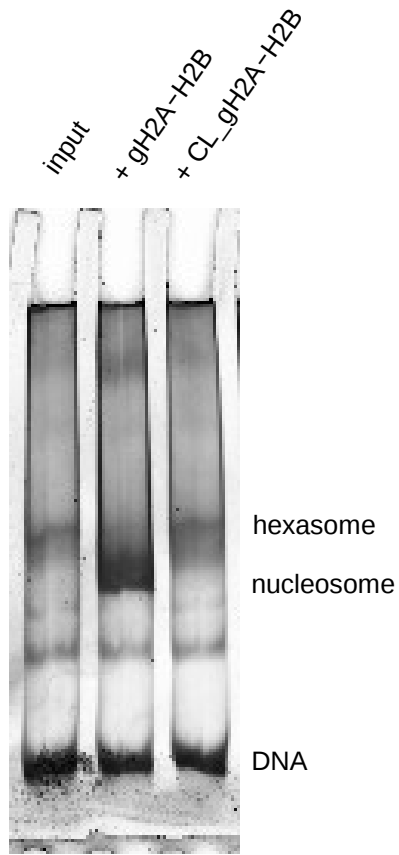

hexasome<sup>crosslinked\_H2A-H2B</sup>

Supplementary Figure 1a

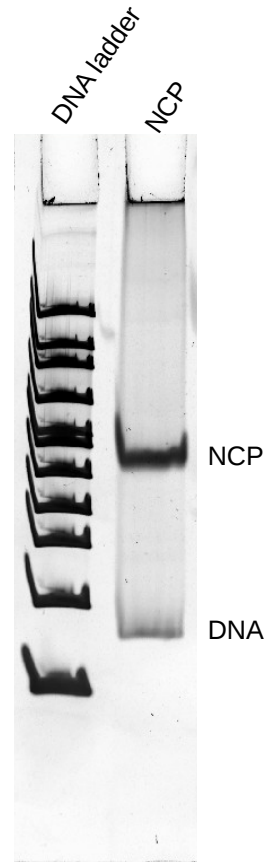

**Supplementary Figure 5a**

fractions

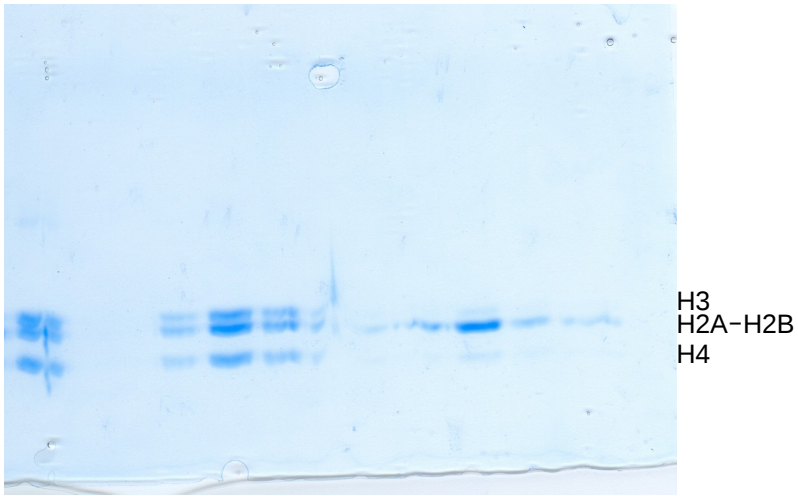

**Supplementary Figure 5c**

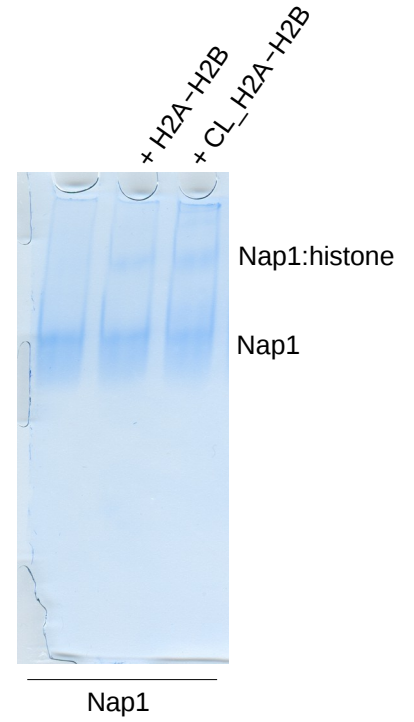

**Supplementary Figure 5b**

fractions

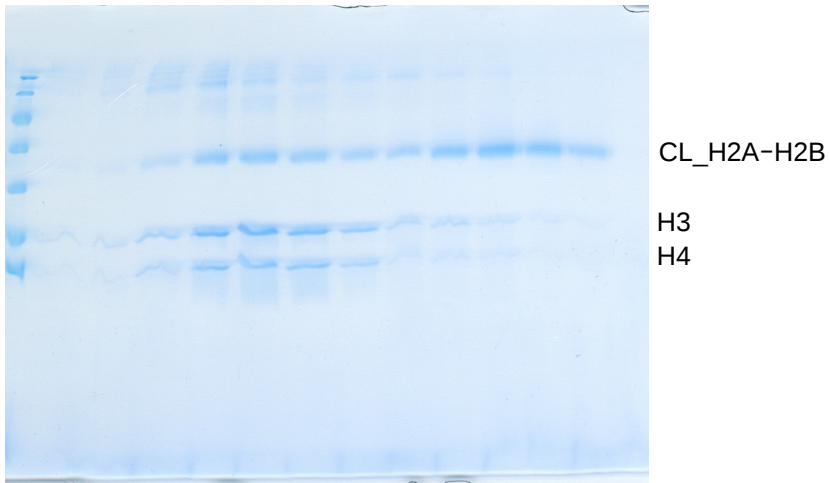

**Supplementary Figure 5d**

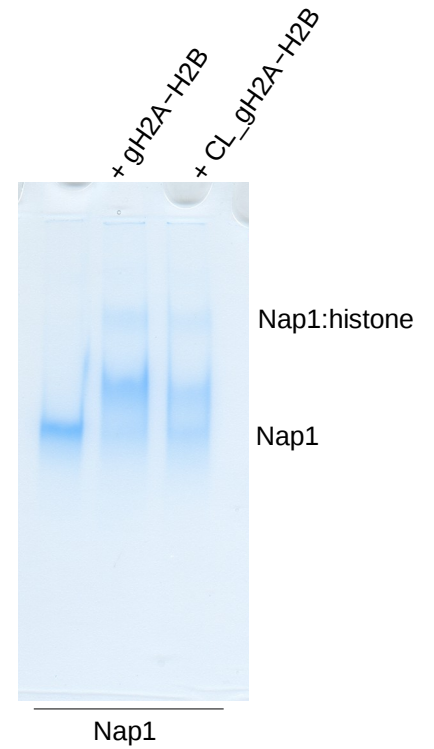

Supplementary Figure 5d

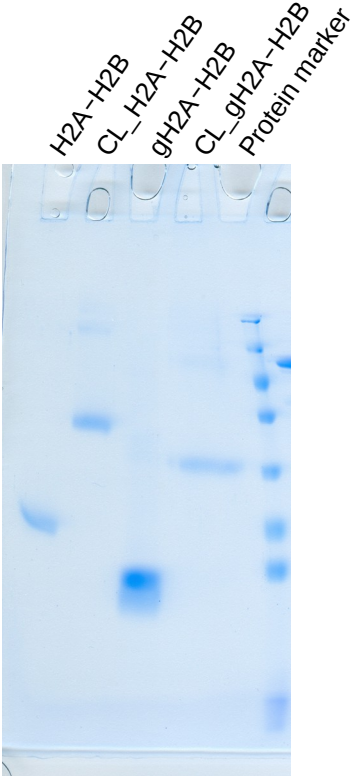

Supplementary Figure 6a

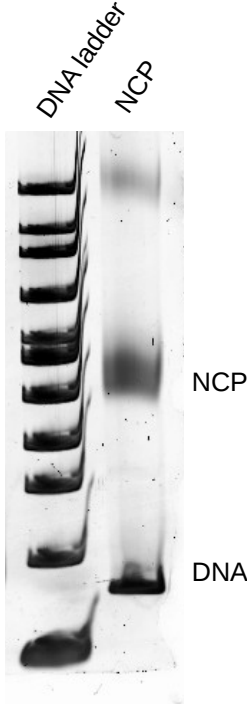

Supplement: NIHMS75370-supplement-Source_data.pdf [file NIHMS75370-supplement-Source_data.pdf]
